# Supplementary material for: HER2 mRNA Levels, Estrogen Receptor Activity and Susceptibility to Trastuzumab in Primary Breast Cancer
Source: MDPI journal article supplement (doi:10.3390/cancers14225650), 2022-11-17
Supplement: s1 [file s1]

**Table S1. Clinicopathological characteristics of HER2-positive breast carcinoma patients according to HER2 mRNA and E2 levels.**

|                              | <b>Cohort 1<br/>n=36</b>     |                               | <b>Cohort 2<br/>n=40</b>   |                             |
|------------------------------|------------------------------|-------------------------------|----------------------------|-----------------------------|
| <b>Characteristic</b>        | <b>HER2 low<br/>n=18 (%)</b> | <b>HER2 high<br/>n=18 (%)</b> | <b>E2 low<br/>n=20 (%)</b> | <b>E2 high<br/>n=20 (%)</b> |
| Age                          |                              |                               |                            |                             |
| Median (interquartile range) | 53 (47-58)                   | 55 (50-59)                    | 58 (56-64)                 | 60 (57-64)                  |
| Size                         |                              |                               |                            |                             |
| ≤ 2 cm                       | 10 (56)                      | 9 (50)                        | 12 (60)                    | 15 (75)                     |
| > 2 cm                       | 8 (44)                       | 9 (50)                        | 8 (40)                     | 5 (25)                      |
| Grade                        |                              |                               |                            |                             |
| II                           | 4 (22)                       | 4 (22)                        | 6 (30)                     | 2 (10)                      |
| III                          | 14 (78)                      | 14 (78)                       | 14 (70)                    | 18 (90)                     |
| Node <sup>b</sup>            |                              |                               |                            |                             |
| N0                           | 3 (17)                       | 2 (11)                        | 9 (45)                     | 6 (30)                      |
| N+                           | 15 (83)                      | 16 (89)                       | 11 (55)                    | 14 (70)                     |
| ER <sup>a</sup>              |                              |                               |                            |                             |
| neg                          | 9 (50)                       | 9 (50)                        | 7 (35)                     | 10 (50)                     |
| pos                          | 9 (50)                       | 9 (50)                        | 13 (65)                    | 10 (50)                     |
| PgR <sup>a</sup>             |                              |                               |                            |                             |
| neg                          | 10 (50)                      | 8 (60)                        | 13 (65)                    | 11 (55)                     |
| pos                          | 8 (50)                       | 10 (40)                       | 7 (35)                     | 9 (45)                      |
| BMI                          |                              |                               |                            |                             |
| <20                          | 0                            | 0                             | 1 (1)                      | 0                           |
| ≥20<25                       | 3 (17)                       | 5 (28)                        | 15 (75)                    | 12 (70)                     |
| ≥25<30                       | 1 (5)                        | 0                             | 4 (20)                     | 4 (20)                      |
| ≥30                          | 0                            | 0                             | 0                          | 2 (10)                      |
| na                           | 14 (78)                      | 13 (72)                       | 0                          | 2 (10)                      |

<sup>a</sup> ER- and PgR-positive, > 10% cell positivity by immunohistochemistry

<sup>b</sup> Node status positive, at least one positive lymph node by histological examination
